# Supplementary material
Source: PubMed Central journal article supplement (PMC2955506)
Supplement: mmc1.pdf [file mmc1.pdf]

Biophysical Journal, Volume 99

**Supporting Material**

**The Energetics of Transmembrane Helix Insertion into a Lipid Bilayer**

Alan Chetwynd, Chze Ling Wee, Benjamin Hall, and Mark S.P. Sansom

## THE ENERGETICS OF TRANSMEMBRANE HELIX INSERTION INTO A LIPID BILAYER

Alan Chetwynd, Chze Ling Wee, Benjamin A. Hall, Mark S. P. Sansom

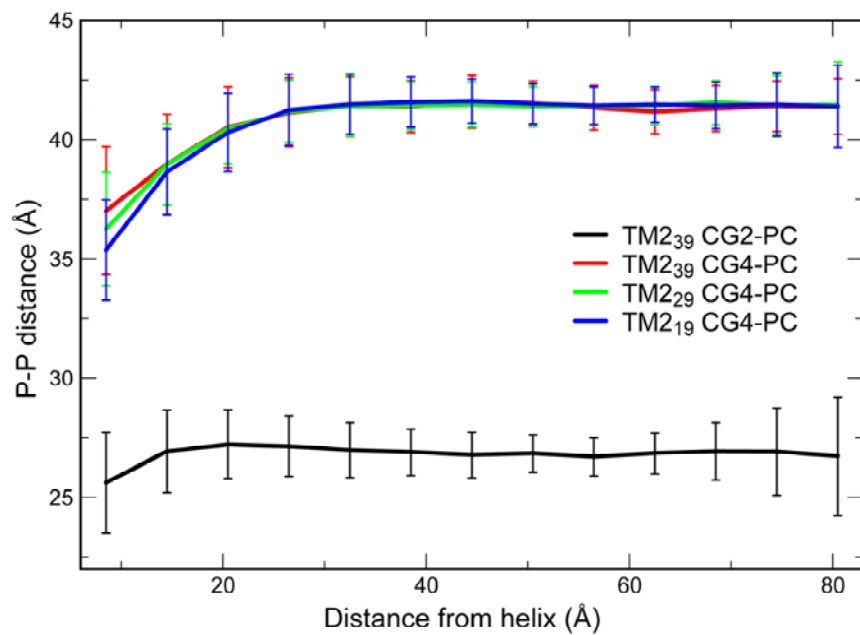

*Figure S1:*

Bilayer thickness (measured as the mean distance project on the bilayer normal,  $d_{PP}$ , between phosphate particles of opposing leaflets) as a function of radial distance from the inserted helix for the central window (i.e. with a TM helix) of each simulation.
